# Supplementary material
Source: publisher figshare collection journal article supplement (https://acs.figshare.com/ndownloader/files/25319045)
Supplement: Supplementary file 1 [file 25319045]

Compound	SMILES
5a	O=C(OC)CCCCCCCN(CC1=CC=CC=C1)CCCCCCCC(OC)=O
6a	O=C(OC)CCCCCCCN(C(OC(C)(C)C)=O)CCCCCCCC(OC)=O
7a	O=C(O[H])CCCCCCCN(C(OC(C)(C)C)=O)CCCCCCCC(O[H])=O
8a	O=C(OC/C=C\CCCCCC)CCCCCCCN(C(OC(C)(C)C)=O)CCCCCCCC(OC/C=C\CCCCCC)=O
9a	O=C(OC/C=C\CCCCCC)CCCCCCCN([H])CCCCCCCC(OC/C=C\CCCCCC)=O
10a	O=C(OC/C=C\CCCCCC)CCCCCCCN(C(SCCN(C)C)=O)CCCCCCCC(OC/C=C\CCCCCC)=O
10b	O=C(OC/C=C\CCCCCC)CCCCCCCN(C(SCCN(CC)CC)=O)CCCCCCCC(OC/C=C\CCCCCC)=O
10c	O=C(OC/C=C\CCCCCC)CCCCCCCN(C(SCCCN(C)C)=O)CCCCCCCC(OC/C=C\CCCCCC)=O
10d	O=C(OC/C=C\CCCCCC)CCCCCCCN(C(SCCCN(CC)CC)=O)CCCCCCCC(OC/C=C\CCCCCC)=O
11	O=C(O[H])CCCCCCCN([H])C(OC(C)(C)C)=O
12a	O=C(OC(CCCC)CCCC)CCCCCCCN([H])C(OC(C)(C)C)=O
13a	O=C(OC(CCCC)CCCC)CCCCCCCN([H])[H]
14a	O=C(OC(CCCC)CCCC)CCCCCCCN([H])CCCCCCCC(OC/C=C\CCCCCC)=O
15a	O=C(OC(CCCC)CCCC)CCCCCCCN(C(SCCN(C)C)=O)CCCCCCCC(OC/C=C\CCCCCC)=O
12b	O=C(OC(CCCCC)CCCCC)CCCCCCCN([H])C(OC(C)(C)C)=O
13b	O=C(OC(CCCCC)CCCCC)CCCCCCCN([H])[H]
14b	O=C(OC(CCCCC)CCCCC)CCCCCCCN([H])CCCCCCCC(OC/C=C\CCCCCC)=O
15b	O=C(OC(CCCCC)CCCCC)CCCCCCCN(C(SCCN(C)C)=O)CCCCCCCC(OC/C=C\CCCCCC)=O
12c	O=C(OC(CCCCCC)CCCCCC)CCCCCCCN([H])C(OC(C)(C)C)=O
13c	O=C(OC(CCCCCC)CCCCCC)CCCCCCCN([H])[H]
14c	O=C(OC(CCCCCC)CCCCCC)CCCCCCCN([H])CCCCCCCC(OC/C=C\CCCCCC)=O
15c	O=C(OC(CCCCCC)CCCCCC)CCCCCCCN(C(SCCN(C)C)=O)CCCCCCCC(OC/C=C\CCCCCC)=O
12d	O=C(OC(CCCCCCC)CCCCCCC)CCCCCCCN([H])C(OC(C)(C)C)=O
13d	O=C(OC(CCCCCCC)CCCCCCC)CCCCCCCN([H])[H]
14d	O=C(OC(CCCCCCC)CCCCCCC)CCCCCCCN([H])CCCCCCCC(OC/C=C\CCCCCC)=O
15d	O=C(OC(CCCCCCC)CCCCCCC)CCCCCCCN(C(SCCN(C)C)=O)CCCCCCCC(OC/C=C\CCCCCC)=O
12e	O=C(OC(CCCCCCCC)CCCCCCCC)CCCCCCCN([H])C(OC(C)(C)C)=O
13e	O=C(OC(CCCCCCCC)CCCCCCCC)CCCCCCCN([H])[H]
14e	O=C(OC(CCCCCCCC)CCCCCCCC)CCCCCCCN([H])CCCCCCCC(OC/C=C\CCCCCC)=O
15e	O=C(OC(CCCCCCCC)CCCCCCCC)CCCCCCCN(C(SCCN(C)C)=O)CCCCCCCC(OC/C=C\CCCCCC)=O
5b	O=C(OC)CCCN(CC1=CC=CC=C1)CCCC(OC)=O
6b	O=C(OC(C)(C)C)N(CCCC(OC)=O)CCCC(OC)=O
7b	O=C(OC(C)(C)C)N(CCCC(O[H])=O)CCCC(O[H])=O
8b	O=C(OC(C)(C)C)N(CCCC(O[H])=O)CCCC(OC/C=C\CCCCCC)=O
8c	O=C(OC(C)(C)C)N(CCCC(OC(CCCCCC)CCCCCC)=O)CCCC(OC/C=C\CCCCCC)=O
9b	[H]N(CCCC(OC(CCCCCC)CCCCCC)=O)CCCC(OC/C=C\CCCCCC)=O
10e	O=C(OC/C=C\CCCCCC)CCCN(C(SCCN(C)C)=O)CCCC(OC(CCCCCC)CCCCCC)=O
8d	O=C(OC(C)(C)C)N(CCCC(OC(CCCCCCC)CCCCCCC)=O)CCCC(OC/C=C\CCCCCC)=O
9c	[H]N(CCCC(OC(CCCCCCC)CCCCCCC)=O)CCCC(OC/C=C\CCCCCC)=O
10f	O=C(OC/C=C\CCCCCC)CCCN(C(SCCN(C)C)=O)CCCC(OC(CCCCCCC)CCCCCCC)=O
10g	O=C(OC/C=C\CCCCCC)CCCN(C(SCCCN(CC)CC)=O)CCCC(OC(CCCCCCC)CCCCCCC)=O
8e	O=C(OC(C)(C)C)N(CCCC(OC(CCCCCCCC)CCCCCCCC)=O)CCCC(OC/C=C\CCCCCC)=O
9d	[H]N(CCCC(OC(CCCCCCCC)CCCCCCCC)=O)CCCC(OC/C=C\CCCCCC)=O
10h	O=C(OC/C=C\CCCCCC)CCCN(C(SCCN(C)C)=O)CCCC(OC(CCCCCCCC)CCCCCCCC)=O
10i	O=C(OC/C=C\CCCCCC)CCCN(C(SCCCN(CC)CC)=O)CCCC(OC(CCCCCCCC)CCCCCCCC)=O
8f	O=C(OC(C)(C)C)N(CCCC(OC(CCCCC)CCCCC)=O)CCCC(OC(CCCCC)CCCCC)=O
9e	[H]N(CCCC(OC(CCCCC)CCCCC)=O)CCCC(OC(CCCCC)CCCCC)=O
10j	O=C(OC(CCCCC)CCCCC)CCCN(C(SCCN(C)C)=O)CCCC(OC(CCCCC)CCCCC)=O
10k	O=C(OC(CCCCC)CCCCC)CCCN(C(SCCCN(C)C)=O)CCCC(OC(CCCCC)CCCCC)=O
10m	O=C(OC(CCCCC)CCCCC)CCCN(C(SCCCN(CC)CC)=O)CCCC(OC(CCCCC)CCCCC)=O
8g	O=C(OC(C)(C)C)N(CCCC(OC(CCCCCC)CCCCCC)=O)CCCC(OC(CCCCCC)CCCCCC)=O
9f	[H]N(CCCC(OC(CCCCCC)CCCCCC)=O)CCCC(OC(CCCCCC)CCCCCC)=O
10n	O=C(OC(CCCCCC)CCCCCC)CCCN(C(SCCCN(C)C)=O)CCCC(OC(CCCCCC)CCCCCC)=O
8h	O=C(OC(C)(C)C)N(CCCC(OC(CCCCCCC)CCCCCCC)=O)CCCC(OC(CCCCCCC)CCCCCCC)=O
9g	[H]N(CCCC(OC(CCCCCCCC)CCCCCCC)=O)CCCC(OC(CCCCCCC)CCCCCCC)=O
10o	O=C(OC(CCCCCCC)CCCCCCC)CCCN(C(SCCN(C)C)=O)CCCC(OC(CCCCCCC)CCCCCCC)=O
10p	O=C(OC(CCCCCCC)CCCCCCC)CCCN(C(SCCCN(C)C)=O)CCCC(OC(CCCCCCC)CCCCCCC)=O
10q	O=C(OC(CCCCCCC)CCCCCCC)CCCN(C(SCCCN(CC)CC)=O)CCCC(OC(CCCCCCC)CCCCCCC)=O
8i	O=C(OC(C)(C)C)N(CC(OC/C=C\CCCCCC)=O)CC(O[H])=O
8j	O=C(OC(C)(C)C)N(CC(OC/C=C\CCCCCC)=O)CC(OC(CCCCC)CCCCC)=O
9h	[H]N(CC(OC/C=C\CCCCCC)=O)CC(OC(CCCCC)CCCCC)=O
10r	O=C(OC/C=C\CCCCCC)CN(C(SCCN(C)C)=O)CC(OC(CCCCC)CCCCC)=O
8k	O=C(OC(C)(C)C)N(CC(OC/C=C\CCCCCC)=O)CC(OC(CCCCCCC)CCCCCCC)=O
9i	[H]N(CC(OC/C=C\CCCCCC)=O)CC(OC(CCCCCCC)CCCCCCC)=O
10s	O=C(OC/C=C\CCCCCC)CN(C(SCCN(C)C)=O)CC(OC(CCCCCCC)CCCCCCC)=O
8m	O=C(OC(C)(C)C)N(CC(OC/C=C\CCCCCC)=O)CC(OC(CCCCCCCC)CCCCCCCC)=O
9j	[H]N(CC(OC/C=C\CCCCCC)=O)CC(OC(CCCCCCCC)CCCCCCCC)=O
10t	O=C(OC/C=C\CCCCCC)CN(C(SCCN(C)C)=O)CC(OC(CCCCCCCC)CCCCCCCC)=O
10u	O=C(OC/C=C\CCCCCC)CN(C(SCCCN(C)C)=O)CC(OC(CCCCCCCC)CCCCCCCC)=O
10v	O=C(OC/C=C\CCCCCC)CN(C(SCCCN(CC)CC)=O)CC(OC(CCCCCCCC)CCCCCCCC)=O
8n	O=C(OC(C)(C)C)N(CC(OC(CCCCC)CCCCC)=O)CC(OC(CCCCC)CCCCC)=O
9k	[H]N(CC(OC(CCCCC)CCCCC)=O)CC(OC(CCCCC)CCCCC)=O
10w	O=C(OC(CCCCC)CCCCC)CN(C(SCCCN(C)C)=O)CC(OC(CCCCC)CCCCC)=O
10x	O=C(OC(CCCCC)CCCCC)CN(C(SCCCN(CC)CC)=O)CC(OC(CCCCC)CCCCC)=O
8o	O=C(OC(C)(C)C)N(CC(OC(CCCCCCC)CCCCCCC)=O)CC(OC(CCCCCCC)CCCCCCC)=O
9m	[H]N(CC(OC(CCCCCCC)CCCCCCC)=O)CC(OC(CCCCCCC)CCCCCCC)=O
10y	O=C(OC(CCCCCCC)CCCCCCC)CN(C(SCCCN(C)C)=O)CC(OC(CCCCCCC)CCCCCCC)=O
10z	O=C(OC(CCCCCCC)CCCCCCC)CN(C(SCCCN(CC)CC)=O)CC(OC(CCCCCCC)CCCCCCC)=O
8p	O=C(OC(C)(C)C)N(CC(OC(CCCCCCCC)CCCCCCCC)=O)CC(OC(CCCCCCCC)CCCCCCCC)=O
9n	[H]N(CC(OC(CCCCCCCC)CCCCCCCC)=O)CC(OC(CCCCCCCC)CCCCCCCC)=O
10aa	O=C(OC(CCCCCCCC)CCCCCCCC)CN(C(SCCN(C)C)=O)CC(OC(CCCCCCCC)CCCCCCCC)=O
